# Supplementary material for: Facile fabrication of conductive MoS2 thin films by sonication in hot water and evaluation of their electrocatalytic performance in the hydrogen evolution reaction
Source: Royal Society of Chemistry journal article supplement (doi:10.1039/d1na00456e), 2021-10-29
Supplement: d1na00456e1.pdf [file d1na00456e1.pdf]

## Supplementary Information for

### **Facile fabrication of conductive MoS<sub>2</sub> thin films by sonication in hot water and evaluation of their electrocatalytic performance in the hydrogen evolution reaction**

Dipankar Saha,<sup>a</sup> Vinay Patel,<sup>b</sup> Ponnambalam Ravi Selvaganapathy,<sup>b,c</sup> and Peter Kruse<sup>\*a</sup>

<sup>a</sup> Department of Chemistry and Chemical Biology, McMaster University, Hamilton, Ontario L8S 4M1, Canada.

<sup>b</sup> School of Biomedical Engineering, McMaster University, Hamilton, Ontario L8S 4L8, Canada.

<sup>c</sup> Department of Mechanical Engineering, McMaster University, Hamilton, Ontario L8S 4L7, Canada.

Corresponding author email: [pkruise@mcmaster.ca](mailto:pkruise@mcmaster.ca)

## Two-probe conductivity measurement comparison

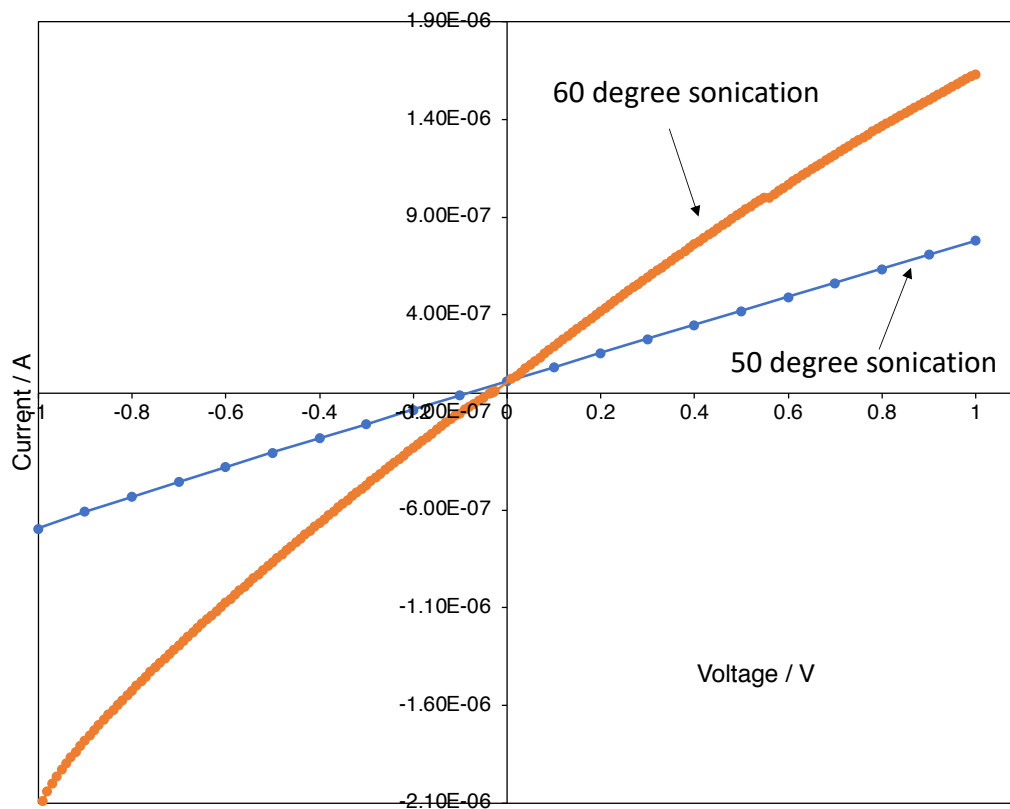

**Figure S1:** I vs. V graph comparison of two-probe conductivity measurement of MoS<sub>2</sub> samples exfoliated at 50 °C and 60 °C in water. Conductivity measurements are carried out using a Keithley 2450 Source Meter at room temperature. Geometry of the film is fabricated as previously reported in ref. 1.

## X-ray diffraction

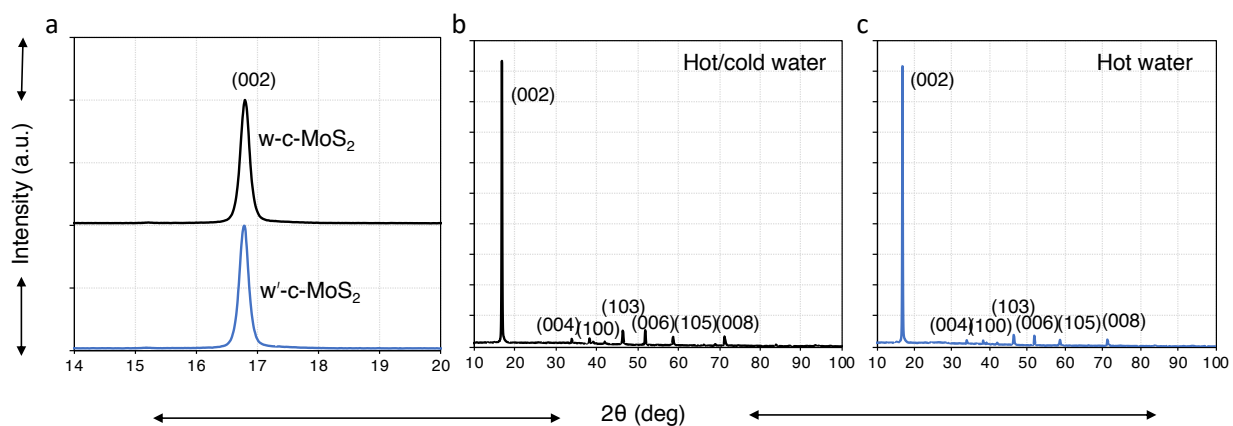

**Figure S2:** XRD of water exfoliated c-MoS<sub>2</sub> solid films. There is no peak for MoO<sub>2</sub> ( $2\theta \sim 25$  deg). The rest of the features match well to 2H-MoS<sub>2</sub>. No other discernible peaks remain unidentified indicating that the crystalline part of the sample is 2H-MoS<sub>2</sub>. There is a slight shift of the (002) peaks compared to bulk MoS<sub>2</sub> for all the water exfoliated samples due to the effect of doping. (a) Comparison between the high-resolution XRD (002) peaks near 16° of water exfoliated conductive MoS<sub>2</sub> prepared both ways, showing their crystallographic similarity; (b) XRD of conductive MoS<sub>2</sub> exfoliated using hot and cold-water sonication, and (c) XRD of conductive MoS<sub>2</sub> exfoliated using only hot water sonication.

## Raman spectroscopy

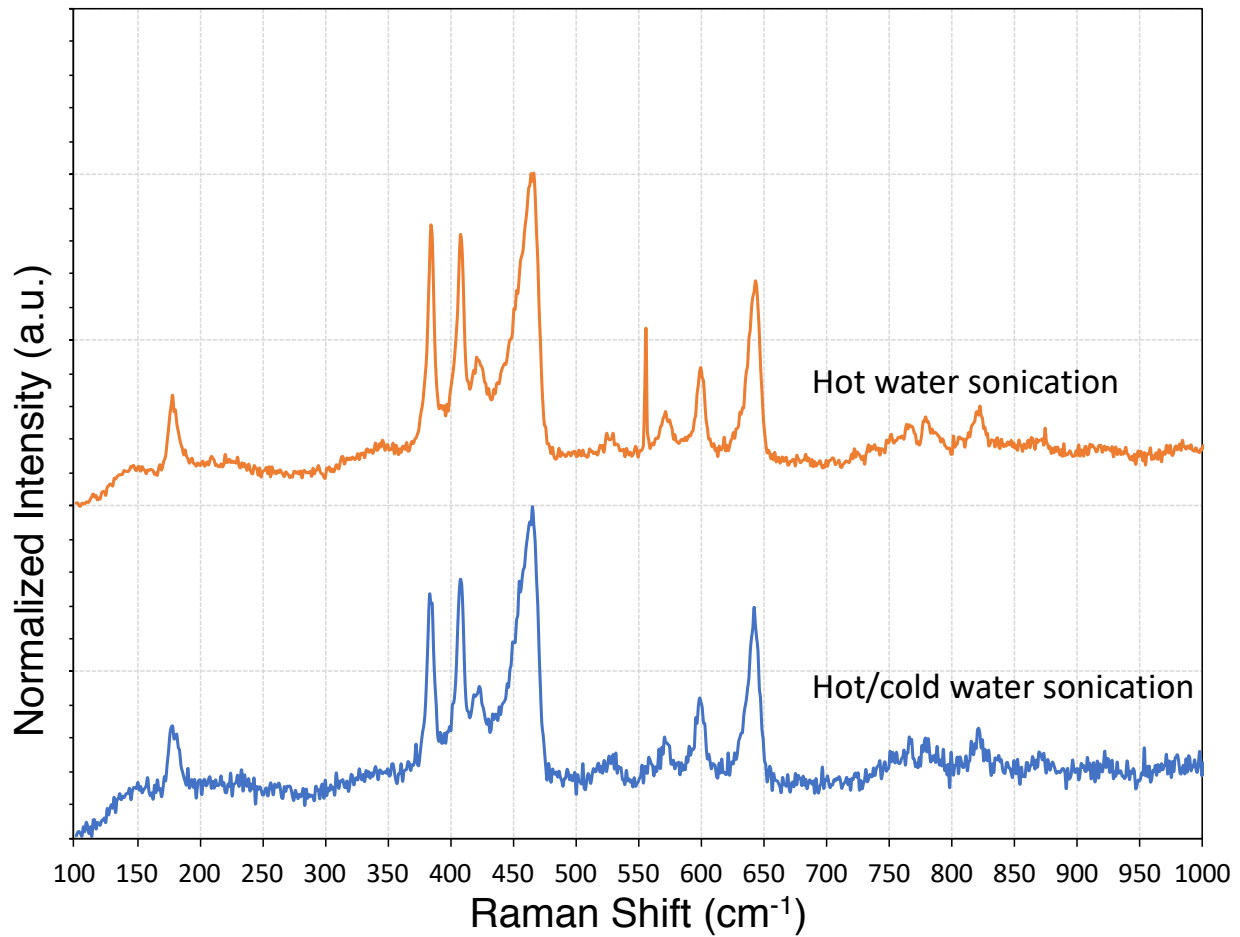

**Figure S3:** Raman spectra of water exfoliated conductive MoS<sub>2</sub> prepared in two ways. The samples were illuminated by a 633 nm laser at 1% power. The peak intensity is normalized based on the highest peak of the spectra (466 cm<sup>-1</sup>). Blue color represents conductive MoS<sub>2</sub> exfoliated using hot and cold-water sonication, and orange color is for conductive MoS<sub>2</sub> exfoliated using only hot water sonication samples.

## High resolution S 2p XPS of pristine semiconducting, water exfoliated, and peroxide exfoliated MoS<sub>2</sub>

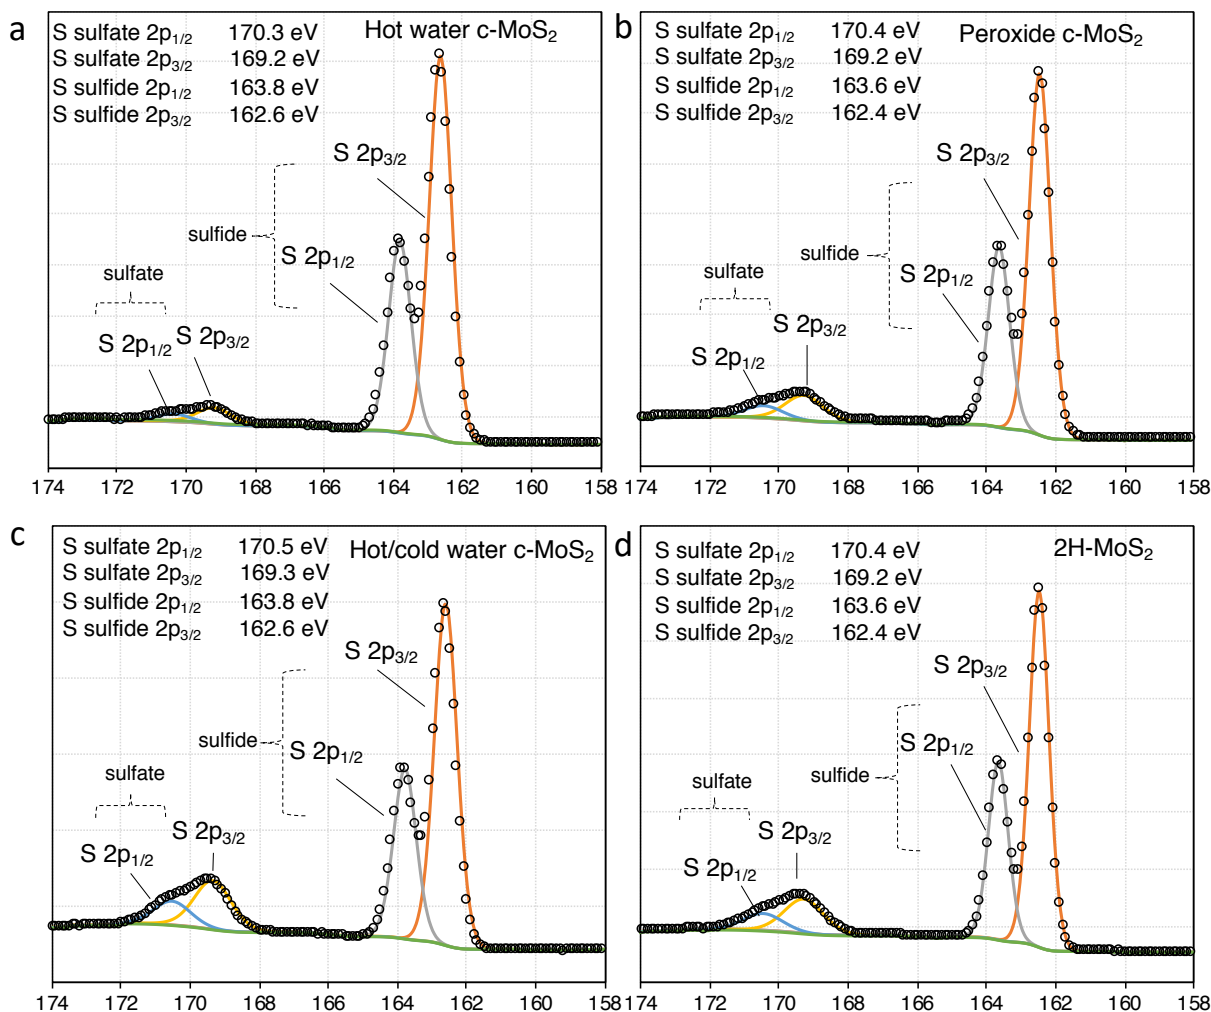

**Figure S4:** XPS high resolution spectra of as-prepared conductive MoS<sub>2</sub> samples, either by hot water sonication only, or by hot water sonication followed by cold water sonication, or by sonication in dilute peroxide, and of semiconducting 2H-MoS<sub>2</sub> samples. Spectra are S 2p for (a) exfoliated conductive MoS<sub>2</sub> using only hot sonication procedure; (b) exfoliated conductive MoS<sub>2</sub> using aqueous peroxide sonication procedure; (c) exfoliated conductive MoS<sub>2</sub> using hot and cold sonication procedure; and (d) exfoliated semiconducting 2H-MoS<sub>2</sub>.

## Colorimetric experiment

### Experiment details:

The amount of  $\text{H}_2\text{O}_2$  was measured using the diethyl-p-phenylenediamine (DPD) method in a Smart 3 colorimeter from LaMotte. The low range protocol with a working range of 0.00 -1.50 ppm was used to quantify the amount of hydrogen peroxide produced in water during sonication. A 10 ml volume of sample was added to a clean reagent tube (Figure S5a). The tube was inserted in the colorimeter to set the blank reading for the measurement. The tube was removed and 4 drops of  $\text{H}_2\text{O}_2$  reagent 1 were added to the sample. Then, one  $\text{H}_2\text{O}_2$  low range tablet was added to the sample and the tablet was crushed using a glass rod followed by mixing for approximately 30 s. The appearance of a pink color in the samples confirms the presence of  $\text{H}_2\text{O}_2$ . However, the final measurement was performed after 5 minutes to ensure full color development. The testing procedure works via the reaction of released iodine with DPD. In presence of excess potassium iodide,  $\text{H}_2\text{O}_2$  reacts with potassium iodide to generate iodine. This released iodine reacts with DPD to generate a pink color proportional in intensity to the amount of iodine.

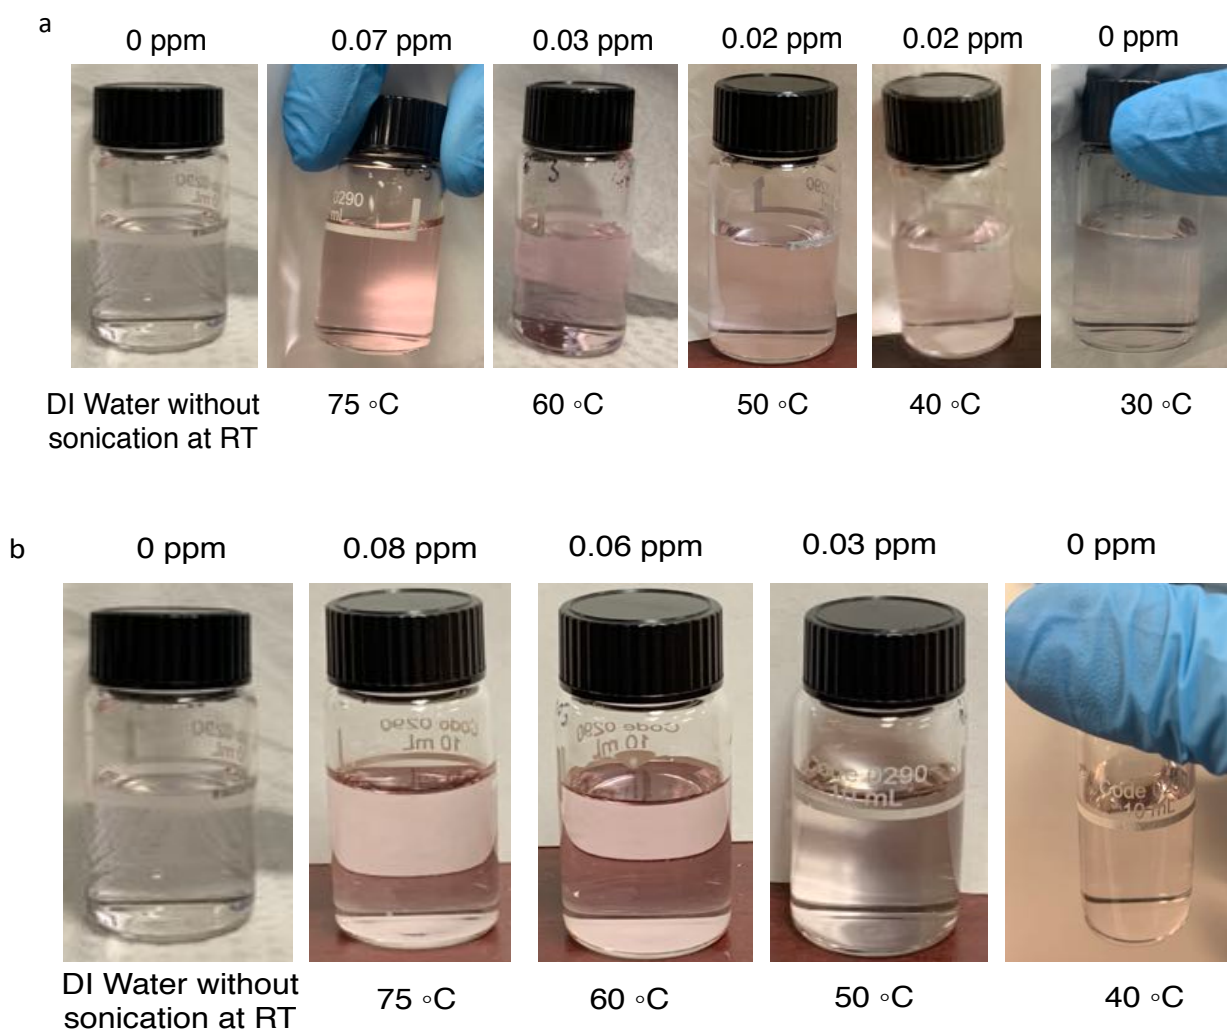

**Figure S5:** Colorimetric test for  $\text{H}_2\text{O}_2$  formation in water at different temperatures and for two different sonication frequencies. All experiments were carried out in DI water. Sonication time for all samples was 3 hours 40 minutes. Temperature was controlled during sonication by using the built-in thermostat and heater of the sonicator. A cooling coil running with tap water was immersed into the sonicator bath for cooling. (a)  $\text{H}_2\text{O}_2$  formation using 37 kHz sonicating frequency; and (b)  $\text{H}_2\text{O}_2$  formation using 80 kHz sonicating frequency.

## Raman spectroscopy of fresh and old water exfoliated MoS<sub>2</sub> sample

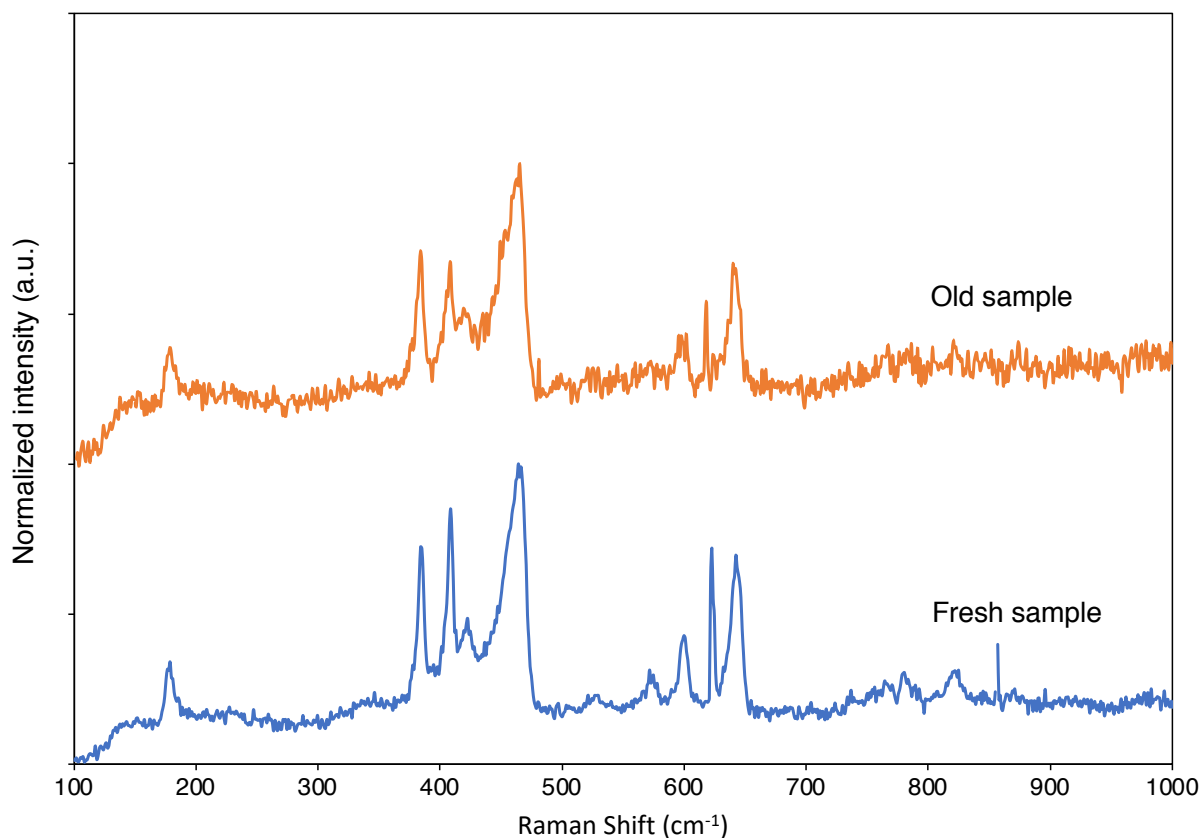

**Figure S6:** Raman spectra of old and fresh water exfoliated conductive MoS<sub>2</sub>. The samples were illuminated by a 633 nm laser at 1% power. The peak intensity is normalized based on the highest peak of the spectra (466 cm<sup>-1</sup>). Fresh sample meaning Raman spectra has taken immediately after exfoliating conductive MoS<sub>2</sub> in a same day and old sample refers to the Raman spectra which has taken 21 days after exfoliating conductive MoS<sub>2</sub>. Old sample has kept in glass petri dish at ambient conditions for 21 days.



## Electrochemical surface area of MoS<sub>2</sub> samples

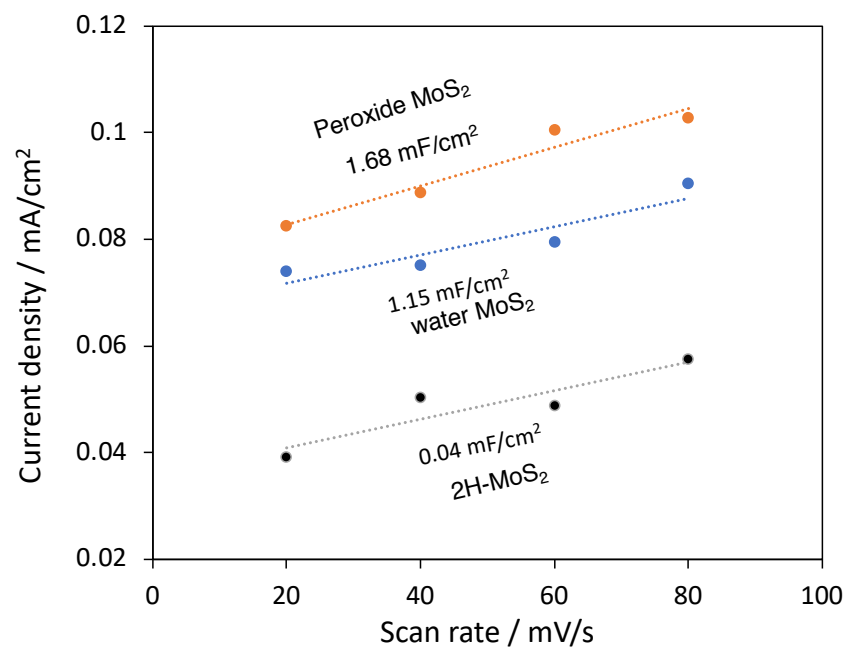

**Figure S7.** Capacitance current density vs different scan rates.

## High resolution XPS of oxidised semiconducting, water and peroxide exfoliated MoS<sub>2</sub> samples

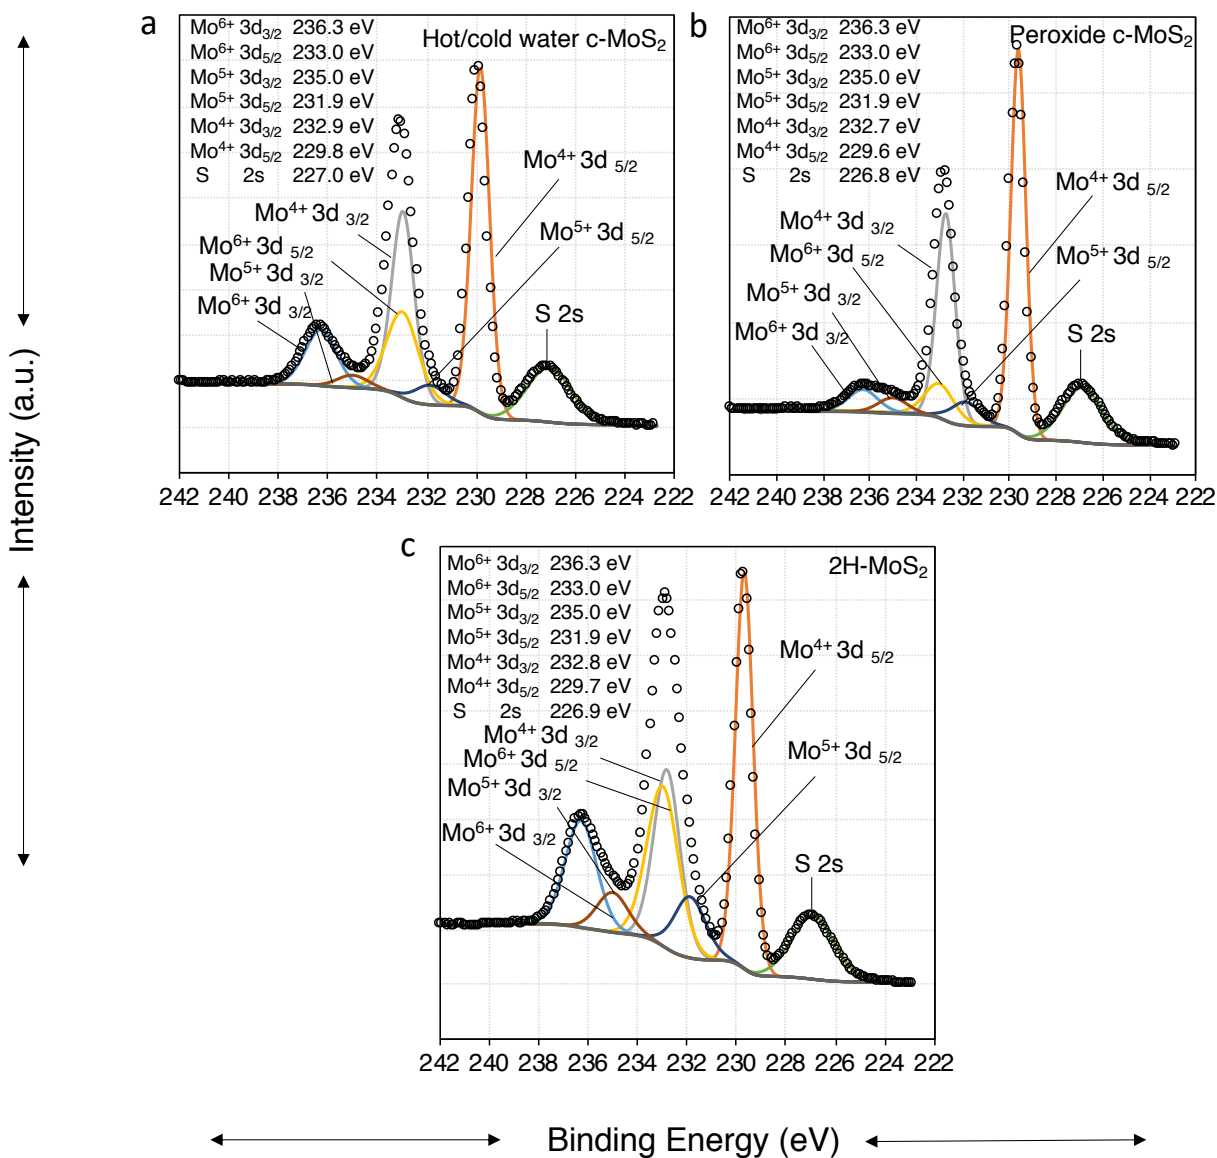

**Figure S8:** XPS high resolution spectra of oxidised water induced conductive MoS<sub>2</sub>, peroxide induced conductive MoS<sub>2</sub> and semiconducting MoS<sub>2</sub> samples. Spectra are Mo 3d for (a) exfoliated conductive MoS<sub>2</sub> using hot and cold sonication procedure (b) exfoliated conductive MoS<sub>2</sub> using aqueous peroxide sonication procedure; and (d) exfoliated semiconducting 2H-MoS<sub>2</sub>

### Tafel plot of oxidised MoS<sub>2</sub> samples

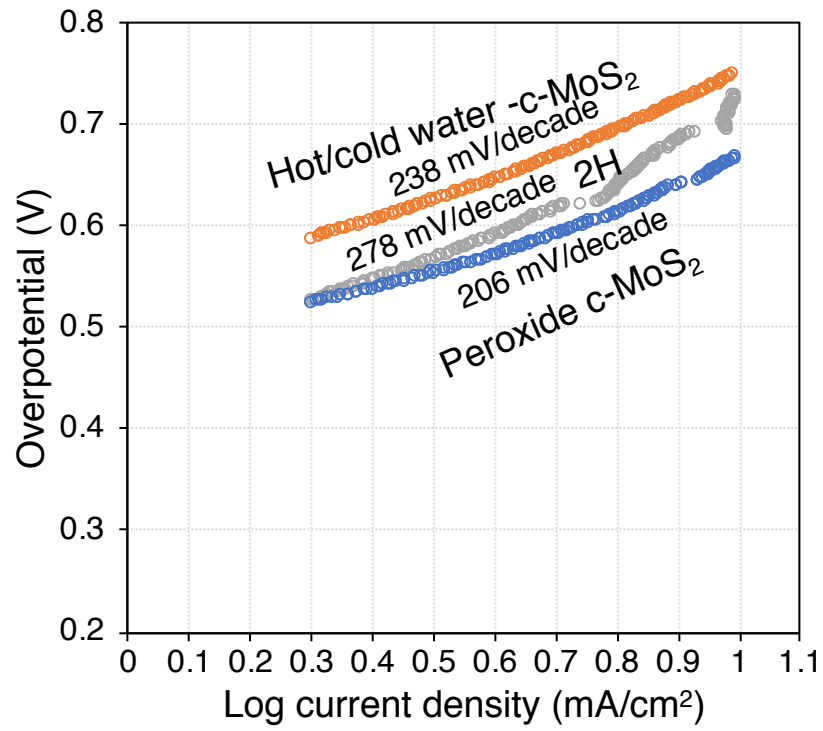

**Figure S9:** Polarization graph of oxidised MoS<sub>2</sub> samples.

## Surface morphology of MoS<sub>2</sub> with carbon nanotubes

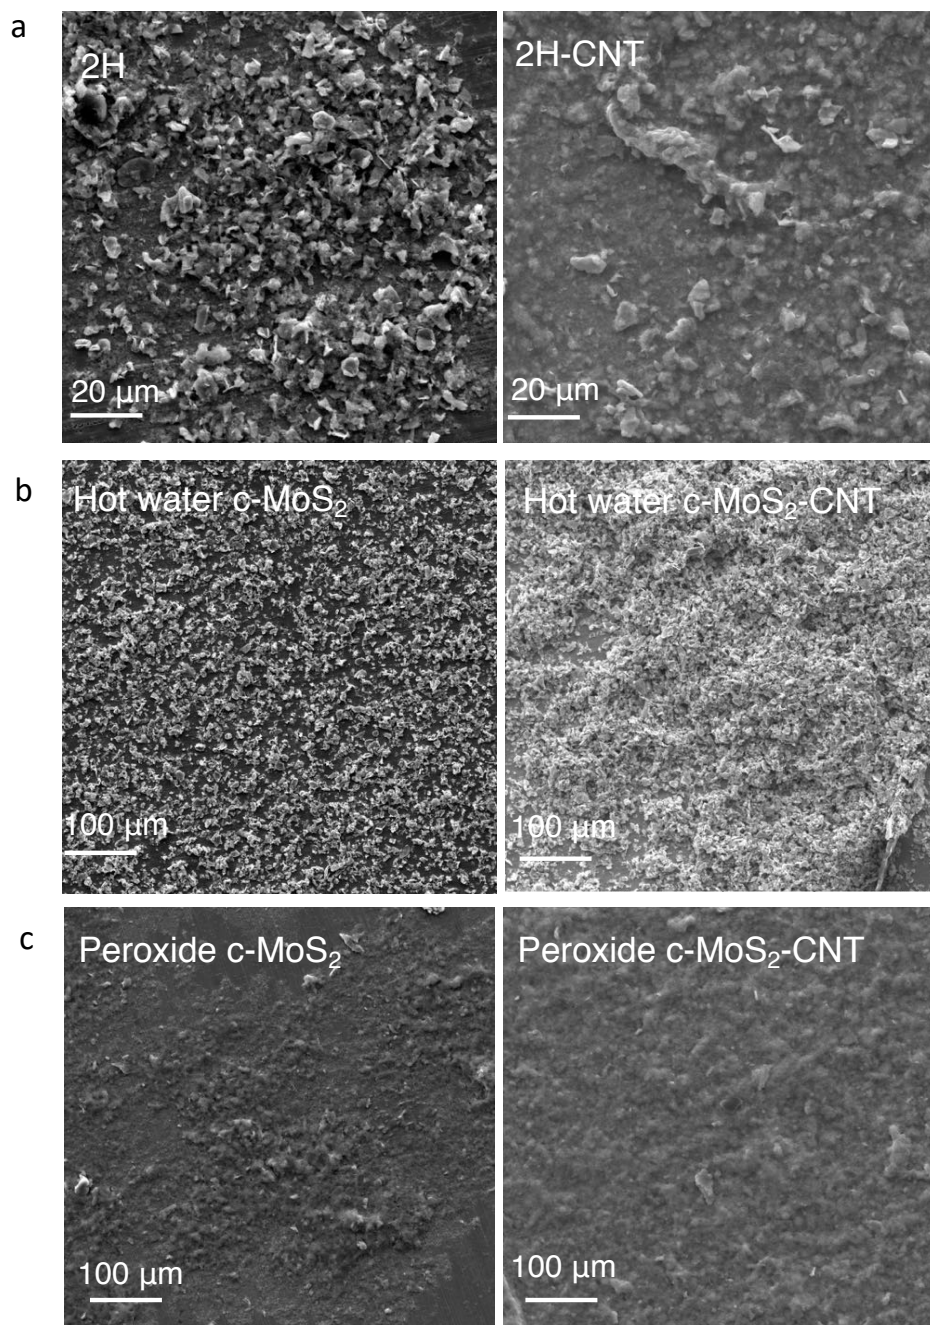

**Figure S10:** SEM images of different pristine MoS<sub>2</sub> (left side) and MoS<sub>2</sub>-SWCNT composite materials (right side). Materials are (a) pristine semiconducting 2H-MoS<sub>2</sub>. Scale bar is 20 μm; (b) Pristine hot and cold water exfoliated c-MoS<sub>2</sub>. Scale bar is 100 μm; and (c) peroxide exfoliated c-MoS<sub>2</sub>. Scale bar is 100 μm

## Polarization value of carbon nanotube-MoS<sub>2</sub>

**Table S1:** Polarization table of SWCNT-MoS<sub>2</sub> samples.

| Material                               | Overpotential (mV) | Tafel Slope (mV/decade) |
|----------------------------------------|--------------------|-------------------------|
| Semiconducting 2H-MoS <sub>2</sub>     | 755                | 323                     |
| Water exfoliated c-MoS <sub>2</sub>    | 759                | 304                     |
| Peroxide exfoliated c-MoS <sub>2</sub> | 716                | 282                     |

## High resolution XPS of semiconducting, water and peroxide exfoliated MoS<sub>2</sub> HER samples

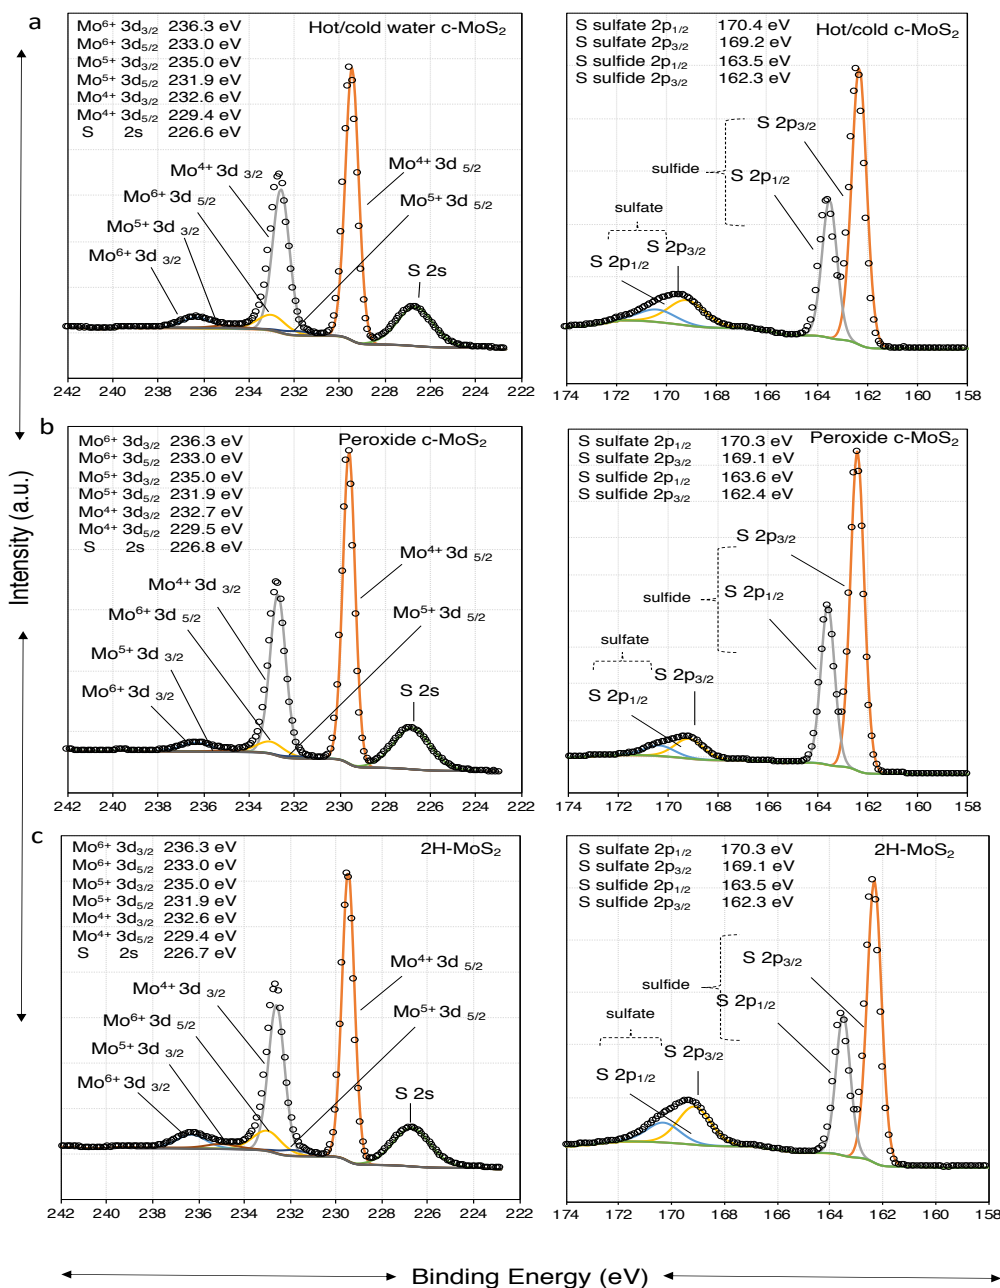

**Figure S11:** XPS high resolution spectra of HER samples. Spectra are Mo 3d and S 2p in (a) exfoliated conductive MoS<sub>2</sub> using hot and cold sonication procedure; (b) exfoliated conductive MoS<sub>2</sub> using aqueous peroxide sonication procedure; and (c) exfoliated 2H-MoS<sub>2</sub>.

## Surface morphology before and after HER

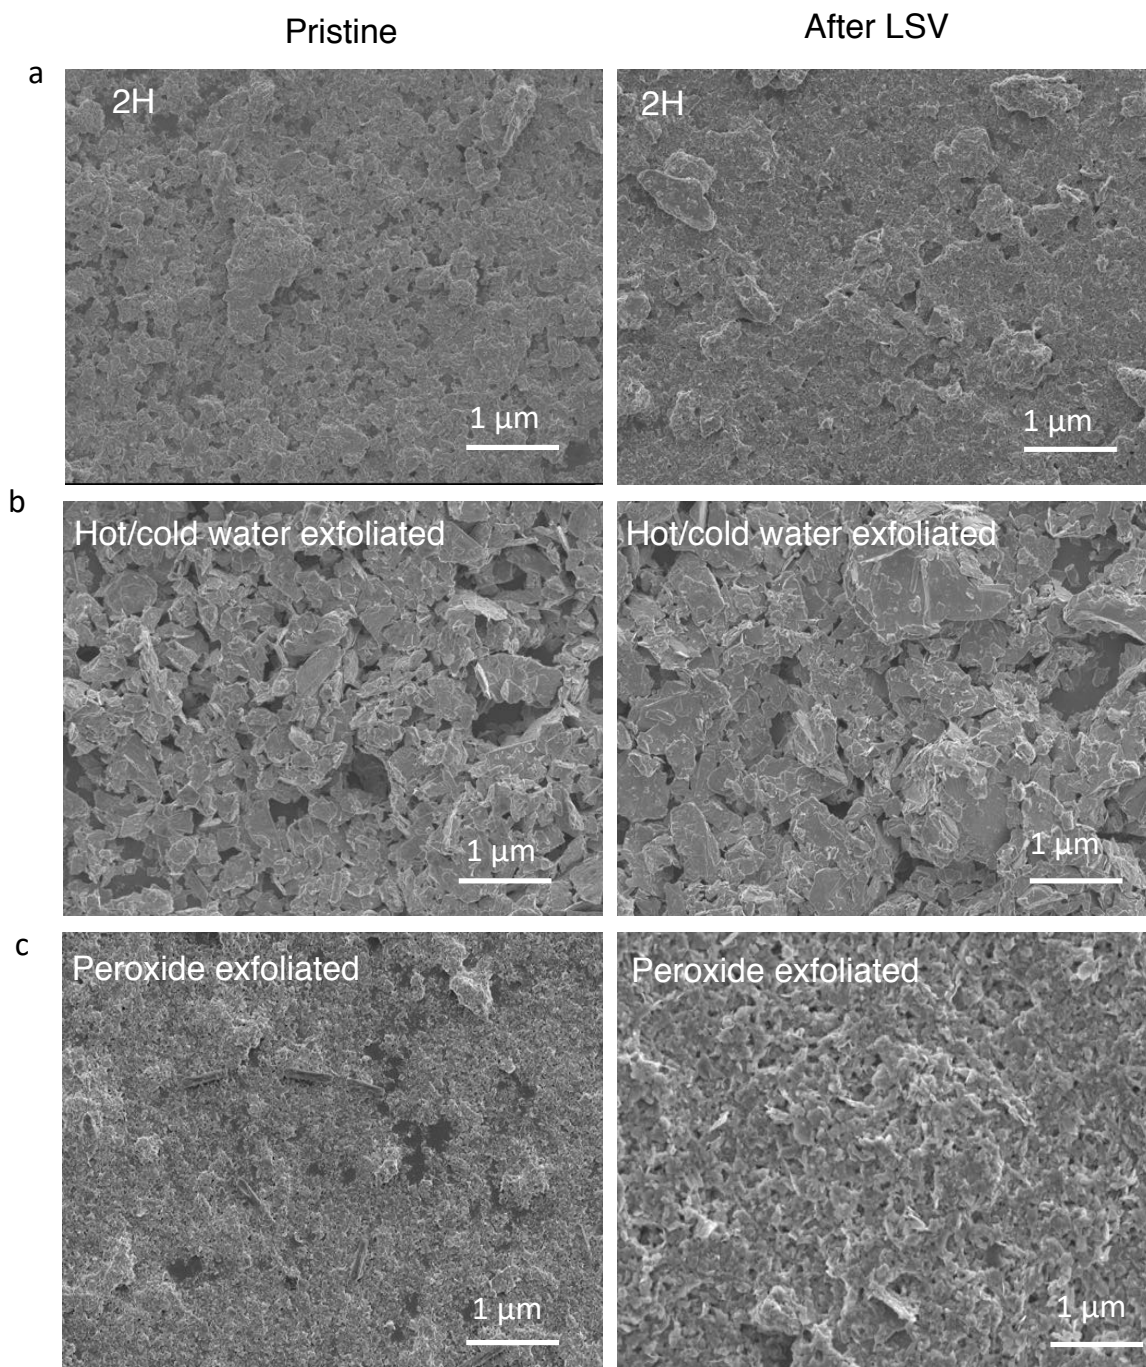

**Figure S12.** High resolution SEM images of different MoS<sub>2</sub> materials before (left side) and after linear sweep voltammetry (right sides). Samples are a) pristine semiconducting 2H-MoS<sub>2</sub>; (b) Pristine hot and cold water exfoliated c-MoS<sub>2</sub>; and (c) peroxide exfoliated c-MoS<sub>2</sub>. All scale bars are 1 μm.

## Cyclic voltammetry of doped MoS<sub>2</sub>

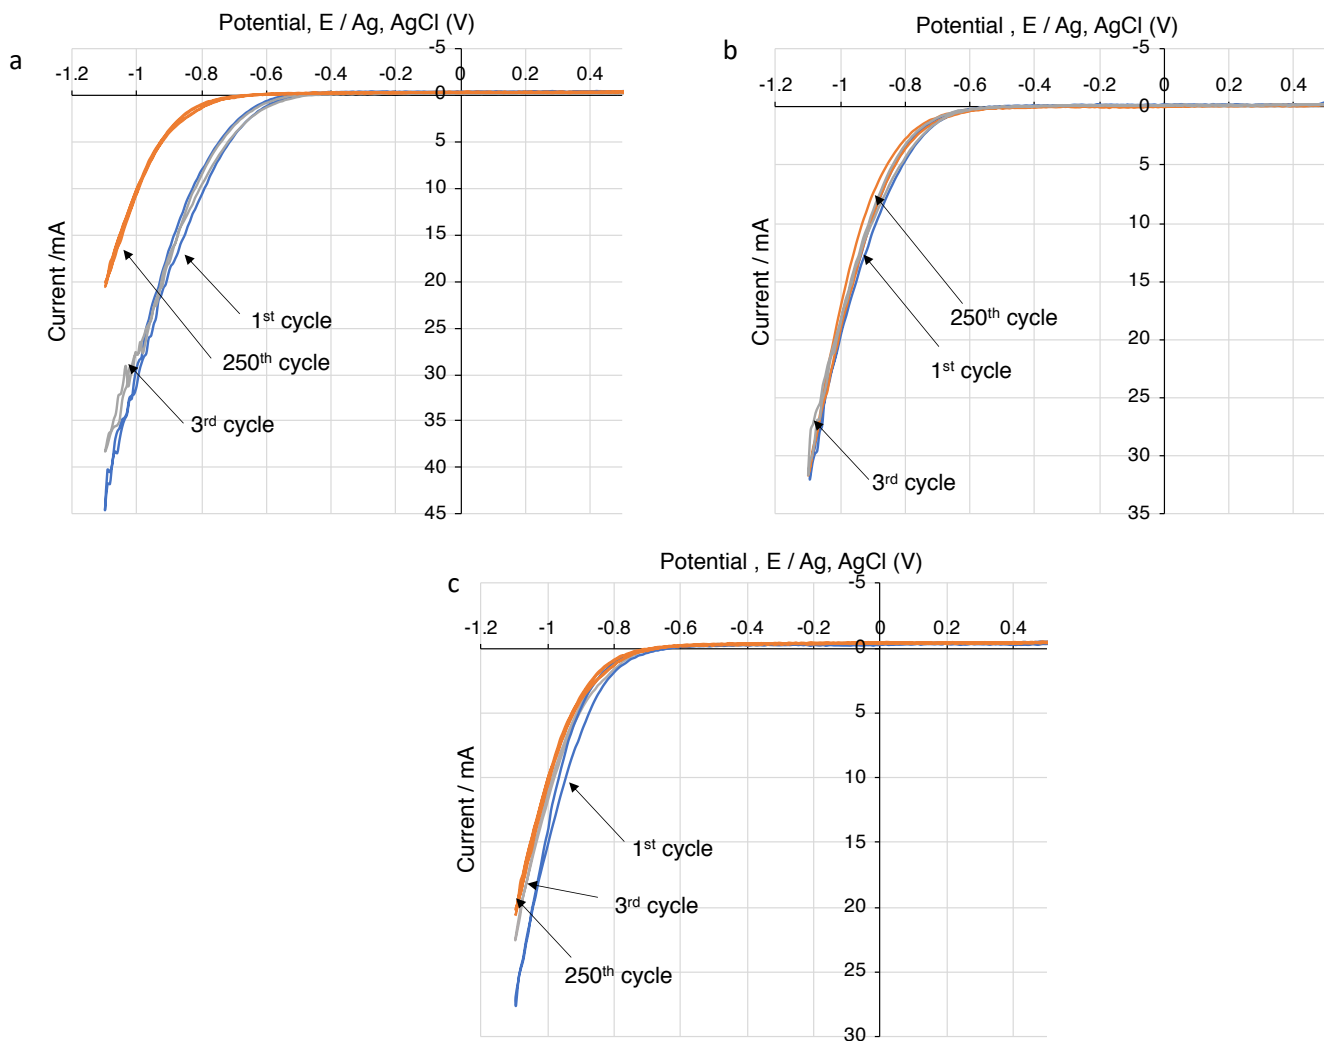

**Figure S13.** Cyclic voltammetry of different MoS<sub>2</sub> materials. Samples are a) Peroxide exfoliated c-MoS<sub>2</sub>, (b) Pristine hot and cold water exfoliated c-MoS<sub>2</sub>; and (c) Pristine semiconducting 2H-MoS<sub>2</sub>. All are the reduction peaks due to the hydrogen evolution.



## Stability of doped MoS<sub>2</sub>

**Table S2.** Polarization values before and after cycling (250 cycles of cyclic voltammetry, see Figure S10) of different doped MoS<sub>2</sub> materials.

| <b>Materials</b>                       | <b>Overpotential before 1<sup>st</sup> cycle (mV)</b> | <b>Overpotential after 250 cycles (mV)</b> | <b>Tafel slope before 1<sup>st</sup> cycle (mV/decade)</b> | <b>Tafel slope after 250 cycles (mV/decade)</b> |
|----------------------------------------|-------------------------------------------------------|--------------------------------------------|------------------------------------------------------------|-------------------------------------------------|
| 2H-MoS <sub>2</sub>                    | 773                                                   | 798                                        | 333                                                        | 317                                             |
| Water exfoliated c-MoS <sub>2</sub>    | 780                                                   | 790                                        | 204                                                        | 170                                             |
| Peroxide exfoliated c-MoS <sub>2</sub> | 632                                                   | 712                                        | 242                                                        | 181                                             |

## Chronoamperometry experiment of MoS<sub>2</sub> samples

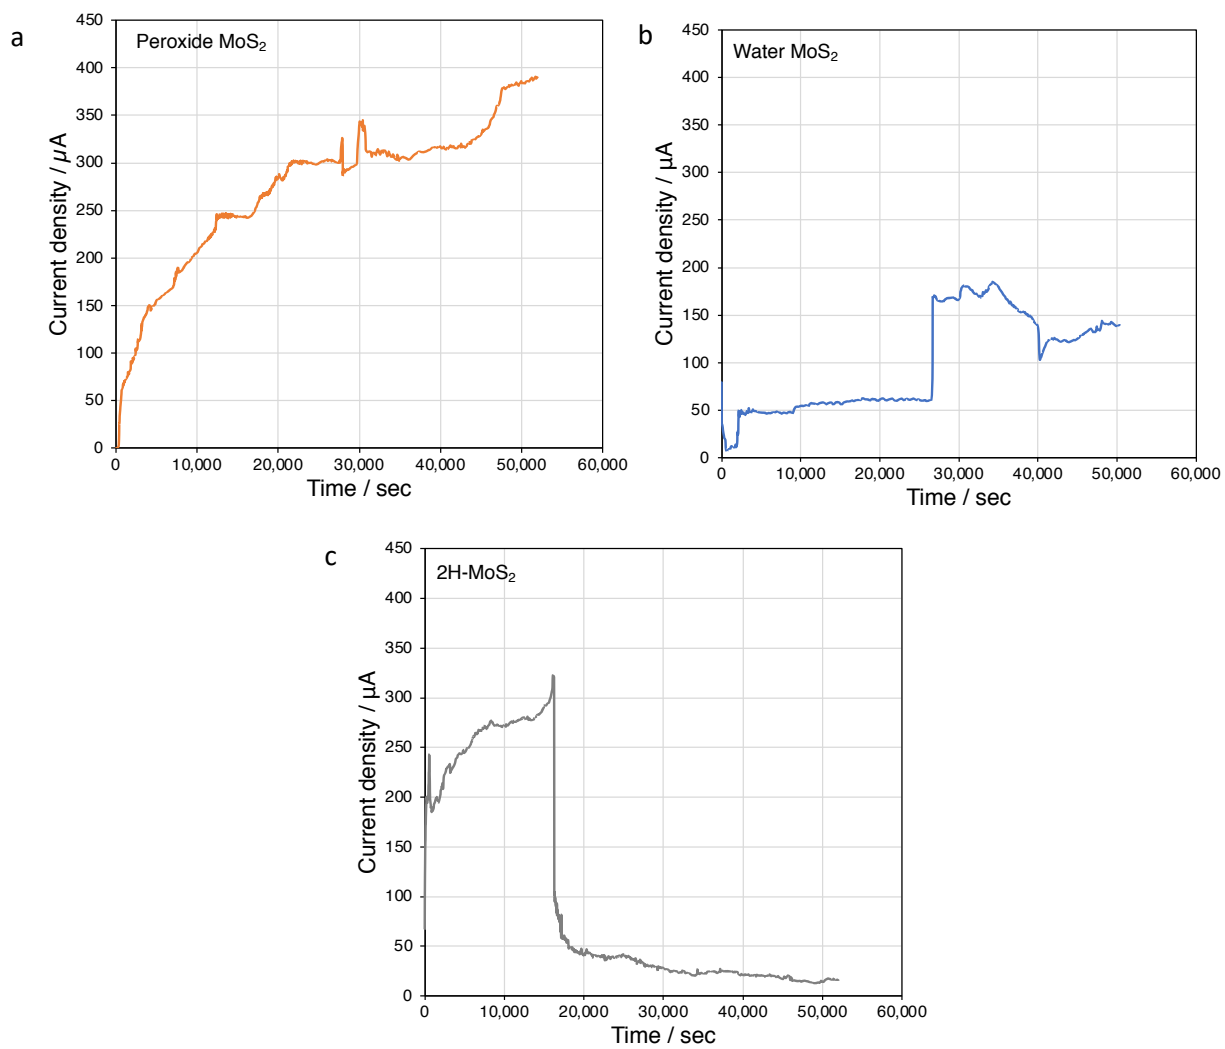

**Figure S14.** Current vs. time plot at fixed overpotential. Samples are a) semiconducting 2H-MoS<sub>2</sub>; (b) hot and cold water exfoliated c-MoS<sub>2</sub>; and (c) peroxide exfoliated c-MoS<sub>2</sub>.

## Raman spectroscopy of MoS<sub>2</sub> samples after chronoamperometry experiment

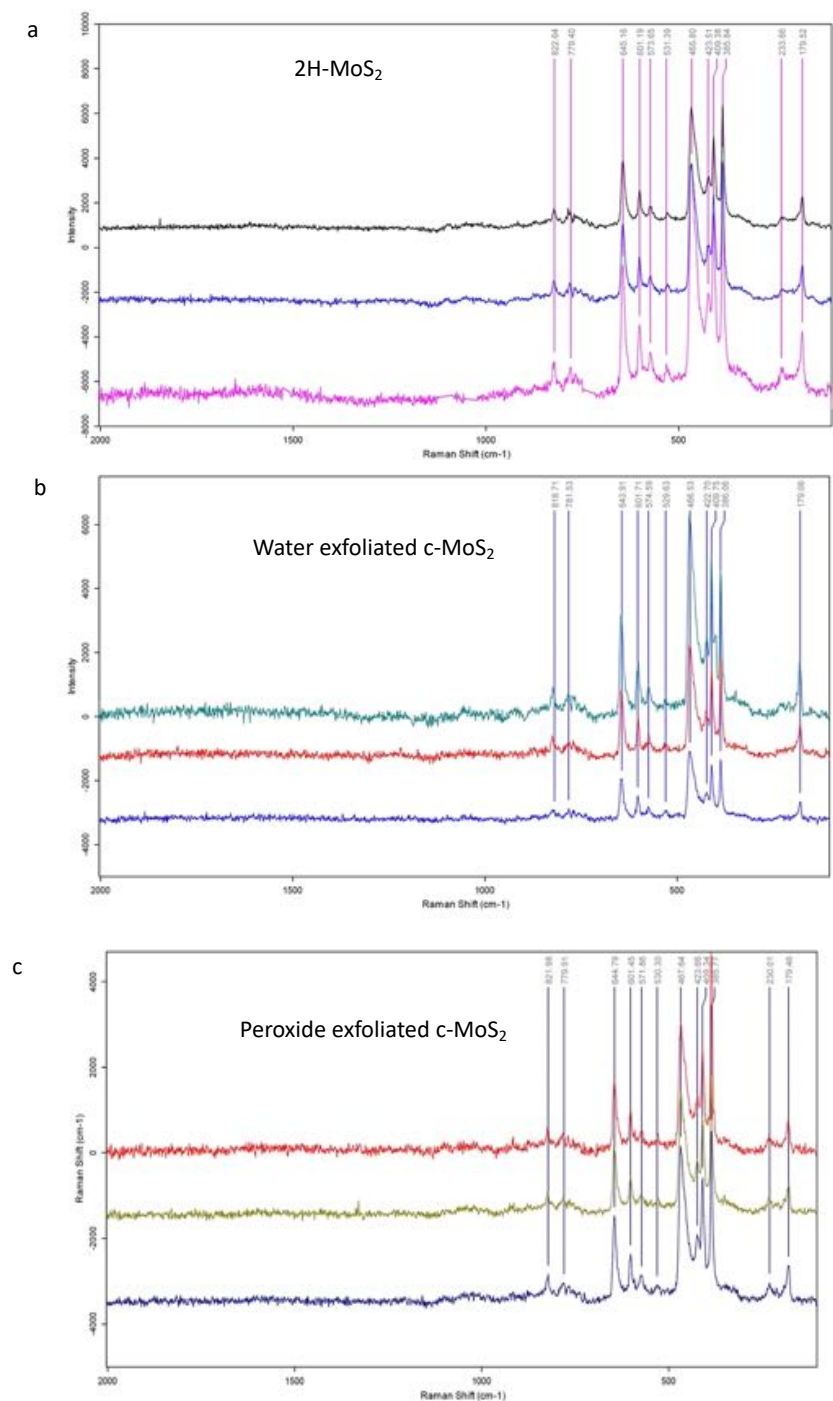

**Figure S15:** Raman spectra of (a) 2H, (b) water and (c) peroxide exfoliated conductive MoS<sub>2</sub>. The samples were illuminated by a 633 nm laser at 1% power. The peak intensity is normalized based on the highest peak of the spectra (466 cm<sup>-1</sup>). For each sample, spectra are taken in a three different spots.

## Compositional changes of pristine samples and samples after completion of the chronoamperometry experiment

**Table S3.** Compositional changes of pristine samples ("before C.E.") and samples after completion of the chronoamperometry experiment ("after C.E.") from high resolution XPS. S to Mo atomic ratios of semiconducting 2H-MoS<sub>2</sub>, water exfoliated c-MoS<sub>2</sub>, and peroxide exfoliated c-MoS<sub>2</sub> samples. The atomic ratios of sulfide to molybdenum (IV) were calculated from the total atomic percentages of Mo and S in high-resolution XPS spectra of S 2p and Mo 3d. The atomic ratios of Mo (IV) relative to the total Mo content in 2H-MoS<sub>2</sub>, water exfoliated c-MoS<sub>2</sub>, and peroxide exfoliated c-MoS<sub>2</sub> samples were calculated by using high-resolution XPS spectra of Mo 3d.

| Samples                                      | Total Mo %<br>(before C.E.) | Total Mo%<br>(after C.E.) | Total S%<br>(before C.E.) | Total S%<br>(after C.E.) | S <sup>2-</sup> /Mo <sup>4+</sup><br>(before<br>C.E.) | S <sup>2-</sup> /Mo <sup>4+</sup><br>(after C.E.) |
|----------------------------------------------|-----------------------------|---------------------------|---------------------------|--------------------------|-------------------------------------------------------|---------------------------------------------------|
| 2H-MoS <sub>2</sub>                          | 10.40                       | 9                         | 15.40                     | 17.80                    | 1.41                                                  | 1.56                                              |
| water<br>exfoliated<br>c-MoS <sub>2</sub>    | 12.50                       | 10.40                     | 16.90                     | 21.20                    | 1.41                                                  | 1.50                                              |
| Peroxide<br>exfoliated<br>c-MoS <sub>2</sub> | 15                          | 11.90                     | 20.20                     | 22.30                    | 1.45                                                  | 1.50                                              |

## SEM of MoS<sub>2</sub> samples after chronoamperometry experiment

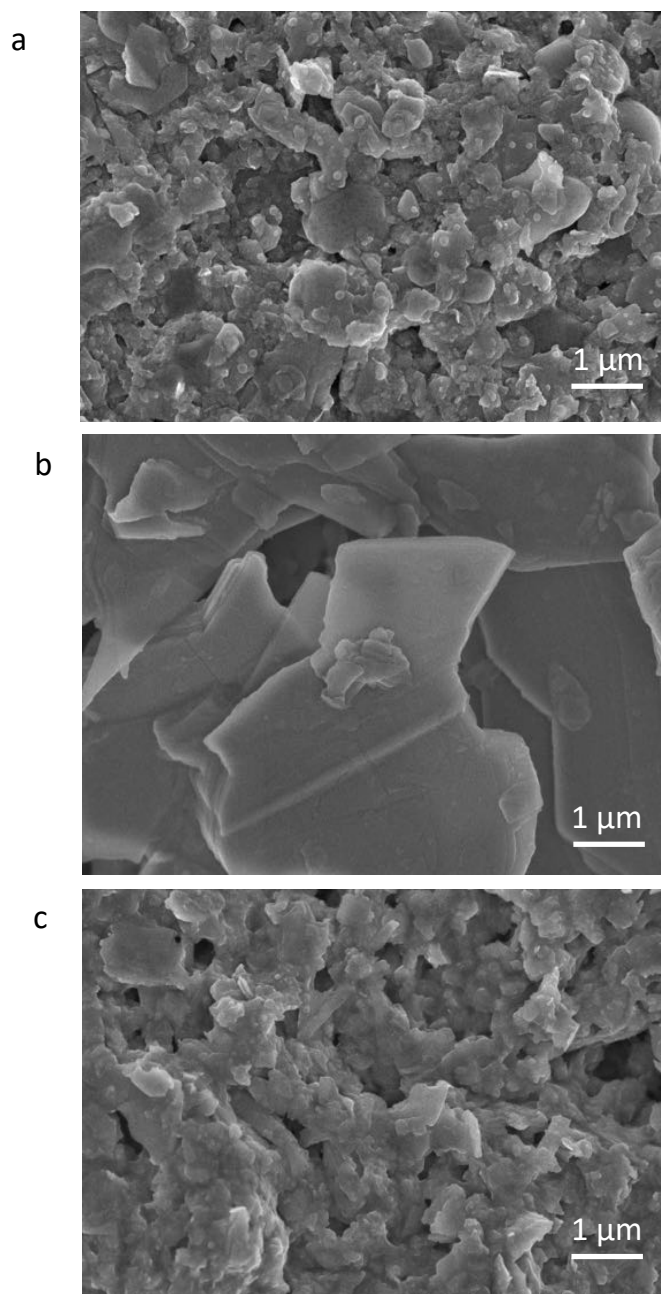

**Figure S16.** High resolution SEM images of different MoS<sub>2</sub> materials after completion of the chronoamperometry experiment. Samples are a) semiconducting 2H-MoS<sub>2</sub>; (b) hot and cold water exfoliated c-MoS<sub>2</sub>; and (c) peroxide exfoliated c-MoS<sub>2</sub>. All scale bars are 1 μm.

## Reference

1. D. Saha, P. R. Selvaganapathy and P. Kruse, *ACS Applied Nano Materials*, 2020, **3**, 10864-10877.
